# Supplementary material for: Effects of Sensory Integration Versus Traditional Resistance Training on Knee Strength and Proprioception in Older Adults
Source: Research Square preprint supplement (doi:10.21203/rs.3.rs-5198973/v1), 2025-04-15
Supplement: Supplementary file 1 [file 0779baf9fe6305fa7e262c0f.docx]

Supplementary Material 2

Changes in Peak Torque of Knee Flexors Across Groups Before and After Intervention


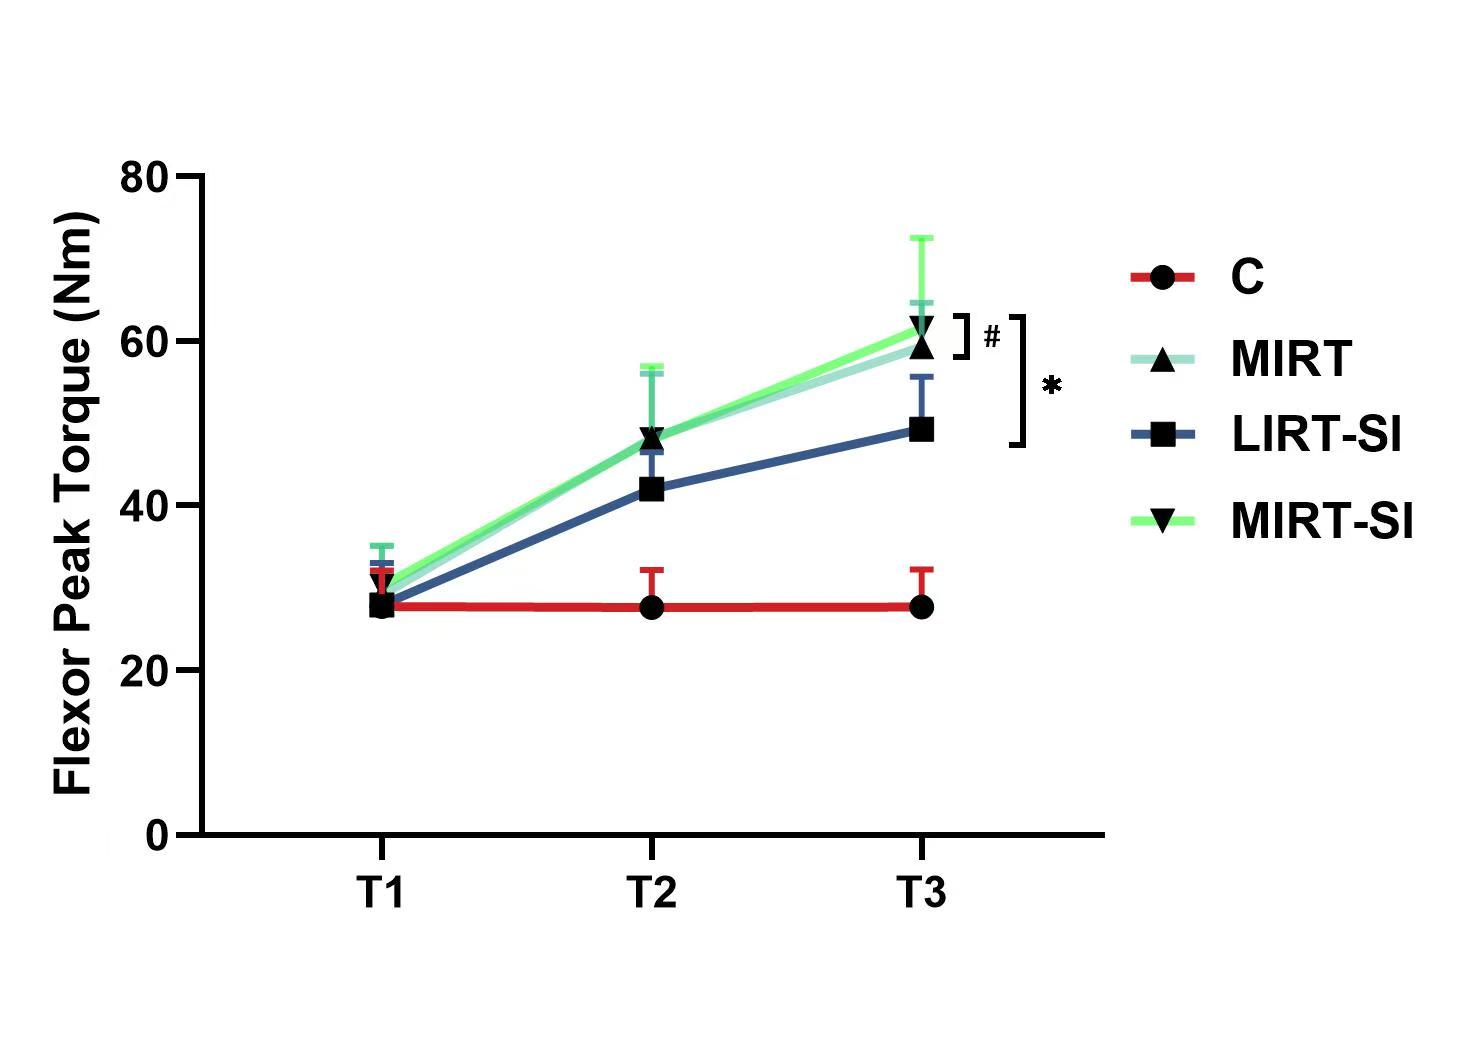


*P < 0.05 compared to Group C; #P < 0.05 compared to Group LIRT-SI. T1, 1 week before the intervention; T2, week 8 of the intervention; T3, week 16 of the intervention.
